# Supplementary material for: A green methodology for the determination of cocaine in camouflaged samples
Source: Royal Society of Chemistry journal article supplement (doi:10.1039/d3ay00113j), 2023-01-01
Supplement: d3ay00113j1.pdf [file d3ay00113j1.pdf]

1 **A GREEN METHODOLOGY FOR THE DETERMINATION OF COCAINE IN CAMOUFLAGED SAMPLES**

2 **D. Gallart-Mateu, A. Gallardo, D. Gallart-Mateu, S. Garrigues, M. de la Guardia**

3  
4 Supplementary material

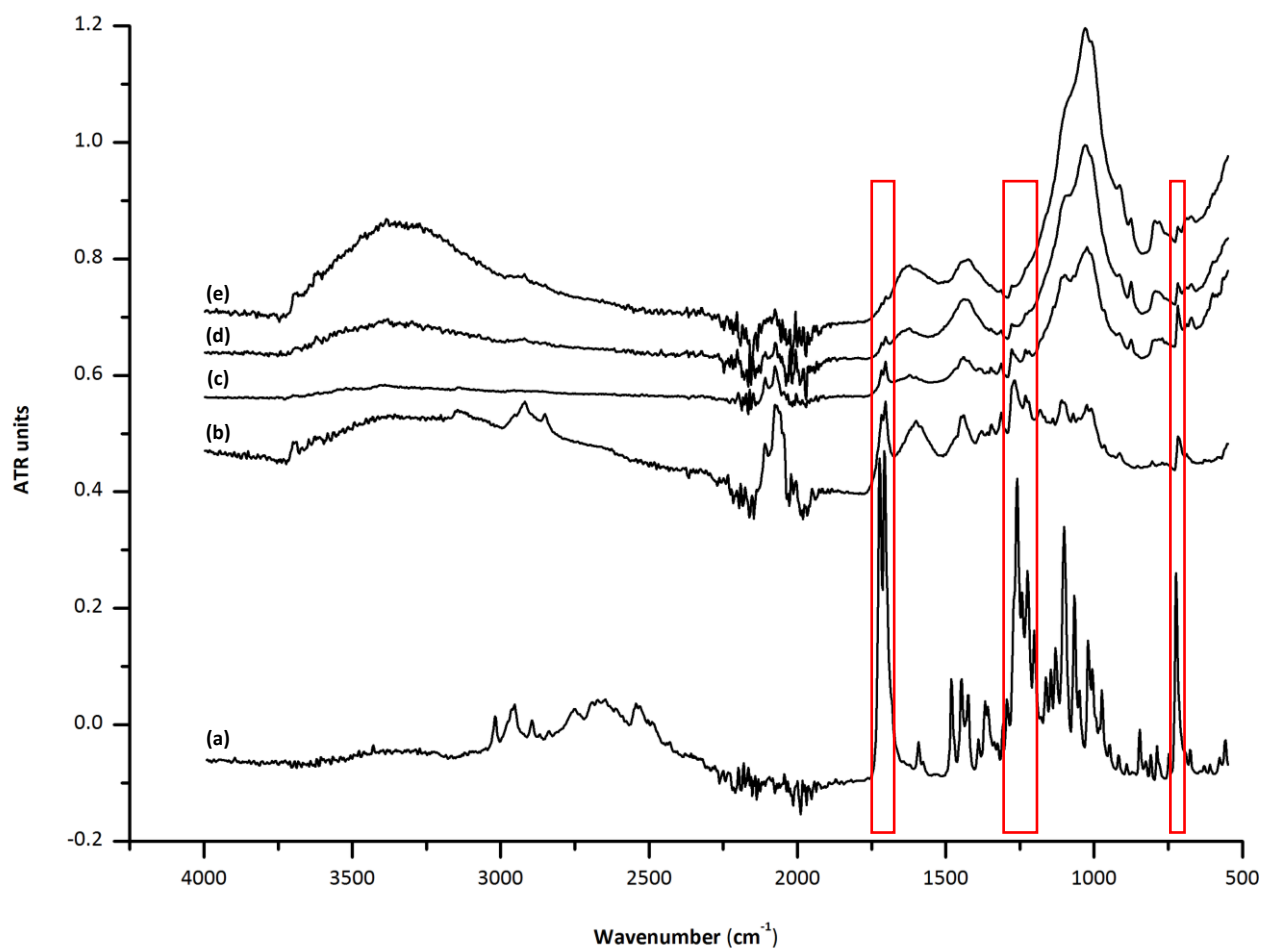

22 **Figure S1.** Direct ATR-FTIR spectra of cocaine hydrochloride standard (a) and powdered carbon (b), soil  
23 (c), coconut fiber (d) and ground palm kernel shell (e) seized camouflaged samples positive in cocaine.  
24 Note: The main characteristic bands of cocaine are indicated by the boxes.
